# Supplementary material for: Obstacle Avoidance and Target Acquisition for Robot Navigation Using a Mixed Signal Analog/Digital Neuromorphic Processing System
Source: PubMed Central journal article supplement (PMC5507184; doi:10.3389/fnbot.2017.00028), 2017-07-11
Supplement: Appendix.pdf [file Appendix.pdf]

## SUPPLEMENTARY MATERIAL

### 1 Appendix A: Neuronal equations

The dynamics of the spiking neurons on the ROLLS chip can be approximated by the differential equation Eqs. (1-3), obtained by performing circuit analysis:

$$\tau \frac{dI_{mem}}{dt} = \frac{\frac{I_{th}}{I_{\tau}}(I_{in} - I_{ahp} - I_{\tau}) + \frac{I_a}{I_{\tau}}(I_{mem} + I_{th}) - I_{mem}(1 + \frac{I_{ahp}}{I_{\tau}})}{(1 + \frac{I_{th}}{I_{mem}})}, \quad (1)$$

$$\tau_{ahp} \frac{dI_{ahp}}{dt} = \frac{I_{thahp}}{I_{\tau_{ahp}}} I_{Ca} u(t) - I_{ahp}, \quad (2)$$

2 where  $I_{mem}$  is the membrane potential,  $I_{ahp}$  is the adaptation current,  $u(t)$  is a step function that is one  
3 during spikes and zero otherwise,  $I_{\tau}$  and  $I_{\tau_{ahp}}$  are time constant currents,  $I_{th}$  and  $I_{thahp}$  are currents  
4 through N-type MOSFETs,  $\tau$  and  $\tau_{ahp}$  are time constants, and  $I_{in}$  is the input current from the synapses.

5 The time constants are dependent on the time constant currents and can be calculated by:

$$\tau = \frac{C_{mem} U_T}{\kappa I_{tau}}, \quad (3)$$

6 where  $\kappa$  is a MOSFET property,  $U_T$  is the thermal potential, and  $C_{mem}$  is the membrane capacitance.  $\tau_{ahp}$   
7 is calculated similarly except it substitutes  $I_{\tau}$  with  $I_{\tau_{ahp}}$  and  $C_{mem}$  with  $C_p$ .

8 These equations approximate an adaptive integrate-and-fire dynamics (Brette and Gerstner, 2005) .

### 9 Appendix B: Biases of the ROLLS chip used in our experiments

10 Table 1 shows the biases used for our experiments to set-up non-plastic connections between the neuronal  
11 populations; Table 2 shows biases for the integrate-and-fire neurons on chip. Each bias corresponds to a  
12 current, supplied to the neuronal circuits and is calculated as Range  $\times$  Value, where letters near the range  
13 mean the order of magnitude: “p” – piko, “n” – nano, “u” – micro (see (Qiao et al., 2015) for details of  
14 the circuit and functional meaning of the biases). The biases are set using software and FPGA-mapping,  
implemented on the Parallella board.

**Table 1.** Hardware biases for the non-plastic synapses

| Bias name         | Range (A) | Value | Flags |
|-------------------|-----------|-------|-------|
| NPA_PWLK_P        | 820p      | 200   | H     |
| NPA_WEIGHT_STD_N  | 15p       | 15    | H N   |
| NPA_WEIGHT_EXC_P  | 820p      | 123   | H     |
| NPA_WEIGHT_EXC0_P | 0.4u      | 15    | H     |
| NPA_WEIGHT_EXC1_P | 0.4u      | 82    | H     |
| NPDPIE_THR_P      | 820p      | 38    | H     |
| NPDPIE_TAU_P      | 105p      | 22    | H     |
| NPA_WEIGHT_INH_N  | 820p      | 82    | H N   |
| NPA_WEIGHT_INH_N0 | 820p      | 200   | H N   |
| NPA_WEIGHT_INH_N1 | 6.5n      | 71    | H N   |
| NPDPII_TAU_P      | 15p       | 51    | H     |
| NPDPII_THR_P      | 820p      | 177   | H     |

**Table 2.** Hardware biases for integrate-and-fire neurons

| Bias name  | Range (A) | Value | Flags |
|------------|-----------|-------|-------|
| IF_RST_N   | 15p       | 17    | H N   |
| IF_BUR_P   | 50p       | 56    | H N   |
| IF_ATHR_N  | 15p       | 0     | H N   |
| IF_RFR1_N  | 820p      | 50    | H N   |
| IF_RFR2_N  | 820p      | 50    | H N   |
| IF_AHW_P   | 15p       | 0     | H     |
| IF_AHTAU_N | 820p      | 37    | N     |
| IF_DC_P    | 15p       | 0     | H     |
| IF_TAU2_N  | 105p      | 77    | N     |
| IF_TAU1_N  | 105p      | 100   | N     |
| IF_NMDA_N  | 15p       | 17    | H N   |
| IF_CASC_N  | 15p       | 17    | H N   |
| IF_THR_N   | 820p      | 100   | H N   |

The eight different values of the synaptic weights that we used in our architecture (-4 : 4) are obtained combining the `NPA_WEIGHT_INH_N`, `NPA_WEIGHT_INH_N1`, and `NPA_WEIGHT_INH_N2` biases for negative weights and the `NPA_WEIGHT_EXC_P`, `NPA_WEIGHT_EXC_P1`, and `NPA_WEIGHT_EXC_P2` biases for positive weights:

$$1 = NPA\_WEIGHT\_EXC\_P$$

$$2 = NPA\_WEIGHT\_EXC\_P + NPA\_WEIGHT\_EXC\_P1$$

$$3 = NPA\_WEIGHT\_EXC\_P + NPA\_WEIGHT\_EXC\_P2$$

$$4 = NPA\_WEIGHT\_EXC\_P + NPA\_WEIGHT\_EXC\_P1 + NPA\_WEIGHT\_EXC\_P2$$

$$-1 = NPA\_WEIGHT\_INH\_N$$

$$-2 = NPA\_WEIGHT\_INH\_N + NPA\_WEIGHT\_INH\_N1$$

$$-3 = NPA\_WEIGHT\_INH\_N + NPA\_WEIGHT\_INH\_N2$$

$$-4 = NPA\_WEIGHT\_INH\_N + NPA\_WEIGHT\_INH\_N1 + NPA\_WEIGHT\_INH\_N2$$

16

## REFERENCES

- 17 Brette, R. and Gerstner, W. (2005). Adaptive exponential integrate-and-fire model as an effective description  
 18 of neuronal activity. *J. Neurophysiol.* 94, 3637–3642. doi:10.1152/jn.00686.2005
- 19 Qiao, N., Mostafa, H., Corradi, F., Osswald, M., Sumislawska, D., Indiveri, G., et al. (2015). A Re-  
 20 configurable On-line Learning Spiking Neuromorphic Processor comprising 256 neurons and 128K  
 21 synapses. *Frontiers in neuroscience* 9
